# Supplementary material for: Chromatin damage generated by DNA intercalators leads to degradation of RNA Polymerase II
Source: PubMed Central journal article supplement (PMC11077059; doi:10.1093/nar/gkae069), 2024-02-10

Supplementary information

**Chromatin damage generated by DNA intercalators leads to degradation of RNA  
Polymerase II**

Jaime A. Espinoza<sup>1#</sup>, Dimitris C. Kanellis<sup>1</sup>, Sheetanshu Saproo<sup>1</sup>, Karla Leal<sup>1</sup>, Johana  
Fernandez Martinez<sup>1</sup>, Jiri Bartek<sup>1,2#</sup> & Mikael S. Lindström<sup>1#</sup>

<sup>1</sup> Science for Life Laboratory, Division of Genome Biology, Department of Medical  
Biochemistry and Biophysics, Karolinska Institutet, S-171 21 Stockholm, Sweden

<sup>2</sup> Danish Cancer Society Research Center, DK-2100 Copenhagen, Denmark

# Correspondence

**Supplementary Figure 1. (A)** Immunoblot analysis of protein levels of POLR1A, POLR2A, POLR3A, MYC, p53 and  $\gamma$ H2AX in U2OS cells treated with chemotherapeutic drugs for 4 hours **(B)** Immunoblot analysis of POLR1A in U2OS and BJ fibroblasts treated with increasing concentrations of CX-5461 for 4 hours. **(C)** RT-qPCR analysis of *POLR1A*, *POLR2A*, *POLR3A*, *MYC* mRNAs and 47S rRNA in BJ fibroblasts, HT29 and RKO cells. Data are presented as the mean  $\pm$  SD (n=3), \*= P value < 0.05, \*\*= P value < 0.01, \*\*\*= P value < 0.001 by Student's t test versus untreated cells **(D)**. RT-qPCR analysis of the mRNA levels for the twelve subunits of II and 47S rRNA in U2OS cells treated with BMH-21 (1  $\mu$ M), Aclarubicin (1  $\mu$ M) and CBL0137 (1  $\mu$ M) for 3 hours. Data are presented as the mean  $\pm$  SD (n=3), \*= P value < 0.05, \*\*= P value < 0.01, \*\*\*= P value < 0.001 by Student's t test versus untreated cells **(C)**.

**Supplementary Figure 2. (A)** Immunofluorescence images of representative cells stained with Fibrillarin and Nucleophosmin primary antibodies after treatment with BMH-21, Aclarubicin, CBL0137 and Actinomycin D for 4 hours. Scale bar 5  $\mu$ m. **(B-C)** Immunofluorescence images of representative cells stained with 5.8S rRNA and POLR1A primary antibodies after treatment with BMH-21 and Aclarubicin in U2OS and BJ fibroblasts cells. Scale bar 5  $\mu$ m. White arrows show nucleolar regions.

**Supplementary Figure 3. (A)** Immunoblot analysis of POLR1A, POLR2A (D8L4Y) and POLR3A in HT29, RKO, BJ, A375 and LoVo cells treated with 1  $\mu$ M BMH-21 for 3 hours. **(B-E)** Immunoblot analysis of BJ Fibroblasts whole cell lysates and subcellular fractions treated with increasing concentrations of **(B)** BMH-21, **(C)**

Aclarubicin, (D) CBL0137 and (E) U2OS cells treated with Actinomycin D. Values under immunoblots represent ratios of POLR1A levels compared to concentration 0 and normalized using their respective Lamin A/C signal. (F) Immunoblot analysis of POLR3A and UBF in whole cell lysate and cellular fractionations of U2OS cells treated with BMH-21 (0.5 and 5  $\mu$ M), Aclarubicin (5  $\mu$ M) and CBL0137 (5  $\mu$ M) for 3 hours.

**Supplementary Figure 4.** (A) Immunoblot analysis of phosphoSer139-H2AX in U2OS cells pre-treated with growing concentrations (0.1-1  $\mu$ M) of BMH-21 for 1 hour and further treated with 1  $\mu$ M Doxorubicin and 1  $\mu$ M Etoposide for 3 hours. (B) Immunoblot analysis of phosphoSer139-H2AX in U2OS pre-treated with Actinomycin D and Triptolide and further treated with 1  $\mu$ M of Doxorubicin and Etoposide for 3 hours.

**Supplementary table S1. Cell lines**

| <b>Cell line</b> | <b>Medium</b>            |
|------------------|--------------------------|
| U2OS             | DMEM 10% FBS + Pen/strep |
| BJ fibroblasts   | DMEM 10% FBS + Pen/strep |
| RKO              | DMEM 10% FBS + Pen/strep |
| Lovo             | DMEM 10% FBS + Pen/strep |
| HT29             | DMEM 10% FBS + Pen/strep |
| A375             | DMEM 10% FBS + Pen/strep |

**Supplementary table S2. Antibodies**

| <b>Antibodies</b>           | <b>Company</b>             | <b>Clone</b> | <b>Catalogue No</b> | <b>Application (dilution)</b> |
|-----------------------------|----------------------------|--------------|---------------------|-------------------------------|
| POLR1A                      | Cell Signalling Technology | D6S6S        | 24799               | WB (1:2,000)<br>IF (1:500)    |
| Rpb1 NTD (POLR2A)           | Cell Signalling Technology | D8L4Y        | 14958               | WB (1:2,000)<br>IF (1:500)    |
| POLR2A-phospho-CTD-Ser-5    | EMD Millipore              | 3E8          | 04-1572             | WB (1:4,000)                  |
| POLR2A-phospho-CTD-Ser-2    | EMD Millipore              | 3E10         | 04-1571             | WB (1:4,000)<br>IF (1:500)    |
| POLR2A                      | Novus Biologicals          | 4H8          | NB200-598           | WB (1:4,000)                  |
| POLR3A                      | Cell Signalling Technology | D5Y2D        | 12825               | WB (1:2,000)                  |
| TOP2A (Topo II Alpha)       | Bethyl Laboratories        | Polyclonal   | A300-054A           | WB (1:2,000)                  |
| TOP2B (Topo II Beta)        | Bethyl Laboratories        | Polyclonal   | A300-950A           | WB (1:2,000)                  |
| TOP1 (Anti-Topoisomerase I) | Abcam                      | EPR5375      | ab109374            | WB (1:2,000)                  |
| Double-stranded DNA         | Abcam                      | 35I9         | Ab27156             | Slot blot (1:4000)            |
| SPT16                       | Cell Signalling Technology | D7I2K        | 12191S              | WB (1:2,000)                  |
| SSRP1                       | Cell Signalling Technology | E1Y8D        | 13421S              | WB (1:2,000)                  |
| Lamin A/C                   | Santa Cruz Biotechnology   | H-110        | sc-20681            | WB (1:2,000)                  |
| Histone H2A                 | Abcam                      | EPR17470     | ab177308            | WB (1:2,000)                  |
| Histone H2B                 | Abcam                      | H2BC12       | ab52484             | WB (1:2,000)                  |
| Histone H2A.X               | Merck Millipore            | Polyclonal   | 07-627              | WB (1:2,000)                  |
| Phospho-H2A.X (ser139)      | Millipore                  | JBW301       | 05-636              | WB (1:4,000)<br>IF (1:500)    |
| Histone H3                  | Merck Millipore            | Polyclonal   | 06-755              | WB (1:2,000)                  |
| Histone H4                  | Merck Millipore            | Polyclonal   |                     | WB (1:2,000)                  |
| Vinculin                    | Abcam                      | EPR8185      | ab129002            | WB (1:2,000)                  |
| p53                         | Abcam                      | DO-1         | ab1101              | WB (1:2,000)                  |
| p21                         | Cell Signalling Technology | 12D1         | 2947                | WB (1:2,000)                  |
| z-DNA                       | Absolute Antibody          | Z22          | Ab00783-3.0         | IF (1:200)                    |
| 5.8S rRNA                   | Novus Biologicals          | Y10b         | NB100-662           | IF (1:500)                    |
| c-Myc                       | Cell Signalling Technology | D84C12       | 5605                | WB (1:2,000)                  |
| $\beta$ -actin              | Abcam                      | AC-15        | ab6276              | WB (1:20,000)                 |
| Fibrillarin                 | Abcam                      | Polyclonal   | ab5821              | IF (1:500)                    |
| Nucleophosmin               | Abcam                      | FC82291      | Ab10530             | IF (1:500)                    |
| Anti-mouse Alexa-647        | Thermo                     | Polyclonal   | A-21235             | IF (1:5000)                   |
| Anti-mouse Alexa-488        | Thermo                     | Polyclonal   | A-11029             | IF (1:5000)                   |
| Anti-rabbit Alexa-647       | Thermo                     | Polyclonal   | A-21244             | IF (1:5000)                   |
| Anti-rabbit Alexa-488       | Thermo                     | Polyclonal   | A-11008             | IF (1:5000)                   |

**Supplementary table S3. Chemicals**

| <b>Chemical</b>                  | <b>Company</b>          | <b>Catalogue code</b> | <b>Solvent</b>                         |
|----------------------------------|-------------------------|-----------------------|----------------------------------------|
| BMH-21                           | Sigma-Aldrich           | SML1183               | DMSO                                   |
| CBL0137                          | Cayman Chemical Company | 19110                 | DMSO                                   |
| Aclarubicin                      | Cayman Chemical Company | 15993                 | DMSO                                   |
| Actinomycin D                    | Sigma-Aldrich           | A1410                 | DMSO                                   |
| Triptolide                       | Tocris                  | 3253                  | DMSO                                   |
| Doxorubicin                      | Sigma-Aldrich           | D1515                 | DMSO                                   |
| Etoposide                        | TopoGen                 | TG4140                | DMSO                                   |
| Camptothecin                     | Sigma-Aldrich           | C9911                 | DMSO                                   |
| Topotecan                        | Sigma-Aldrich           | T2705                 | DMSO                                   |
| Mitoxantrone                     | Sigma-Aldrich           | M6545                 | DMSO                                   |
| Neocarzinostatin                 | Sigma-Aldrich           | N9162                 | DMSO                                   |
| CB-5083                          | Selleck Chemicals       | S8101                 | DMSO                                   |
| MLN-4924                         | Selleck Chemicals       | S7109                 | DMSO                                   |
| THZ1                             | Selleck Chemicals       | S7549                 | DMSO                                   |
| Flavopiridol                     | Cayman Chemical Company | 10009197              | DMSO                                   |
| MG-132                           | Selleck Chemicals       | S2619                 | DMSO                                   |
| CX-5461                          | Selleck Chemicals       | S2684                 | 50 mM NaH <sub>2</sub> PO <sub>4</sub> |
| Oxaliplatin                      | Sigma-Aldrich           | Y0000271              | Water                                  |
| 4-Nitroquinoline N-oxide (4-NQO) | Sigma-Aldrich           | N8141                 | DMSO                                   |
| 5-Fluorouracil                   | Sigma-Aldrich           | F6627                 | DMSO                                   |
| Metarrestin                      | MedChem Express         | HY-120118             | DMSO                                   |

**Supplementary table S4.** RT-qPCR primer sequences

| Target           | Forward                  | Reverse                  |
|------------------|--------------------------|--------------------------|
| 47S_5'ETS*       | GAACGGTGGTGTGTCGTT       | GCGTCTCGTCTCGTCTCACT     |
| 18S_5'-junction* | GCCGCGCTCTACCTTACCTACCT  | CAGACATGCATGGCTTAATCTTTG |
| 18S_3'-junction* | AGTCGTAACAAGGTTTCCGTAGGT | CCTCCGGGCTCCGTTAAT       |
| POLR1A           | TTTGCCGTGTATGGCATCGC     | TGTCATCTGCTGTAGCGGGG     |
| POLR2A           | TCAAGAACTAGTGCGCAGGG     | TGGAACGCAAGTCAATGCG      |
| POLR3A           | GACTTAAAGCCCAGCCAGGT     | GGCTCATCGTCAGGTGTGAA     |
| MYC              | CCCTCCACTCGGAAGGACTA     | GCTGGTGCATTTTCGGTTGT     |
| ACTB             | TCACAATGTGGCCGAGGACTTT   | AGAAGTGGGGTGGCTTTTAGGA   |
| QARS             | ACCTGAACCTGGCATCACTACA   | CCAAGACGCTCAAACCTGGAAC   |
| POLR2B           | GCTTCTGGGCGTTTTTGTGTC    | CCGCGTTCGTACATATTGCCA    |
| POLR2C           | CGGAGCTCACTGACGAGAAT     | CTCAGCGATGAAGACCCTCC     |
| POLR2D           | TCTAAGCCTCTGGCCTGCTA     | GCAGTGGCTCAAGAGTGGAT     |
| POLR2E           | CTGGCCCGATATAAGCTCCG     | TGCCACGCTTTATCCCAA       |
| POLR2F           | ATGACCAAGTACGAGCGAGC     | AGCAGAGGATCTGTCTCCCC     |
| POLR2G           | GGACCCGTGTGGACAAGAAT     | TAGGACCAAGGGTAGGAGGC     |
| POLR2H           | TTGTTCAAGCCTGAGTGGCA     | TCACAGGCGAGTCAGTTTCC     |
| POLR2I           | AGATTATCGCCGACGTGTCC     | AGAACACAGCCTCCTTGTGG     |
| POLR2L           | GACTGGGCCATGAACCTCTCC    | GGAGGGAACCTCAAAGAGCC     |
| POLR2J           | CACCCCTTGGAGCACAAGAT     | TCGGTGATGGCGTTGGTAAA     |
| POLR2K           | TTGGAAACGCGGAGTGAGTT     | GCTGCTTTGGAGGTTGAACG     |

\*Sequences obtained from Kwon *et al*, 2014 (22).

# Supplementary Figure 1

**A**

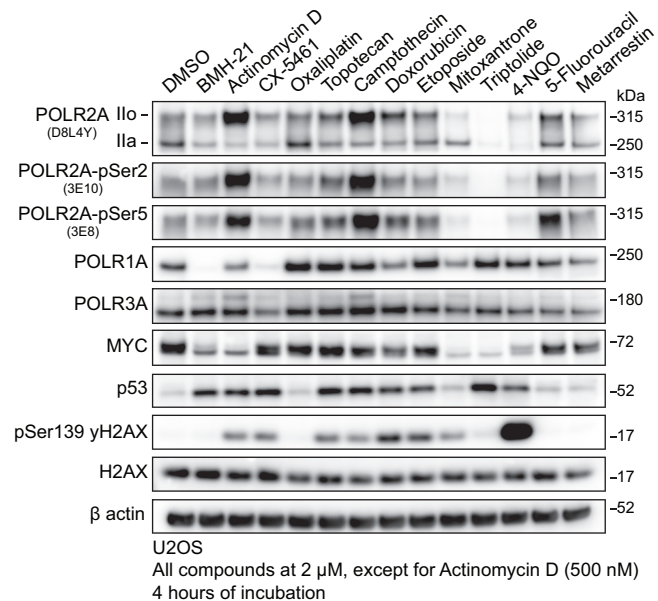

**B**

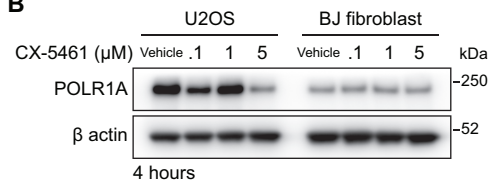

**C**

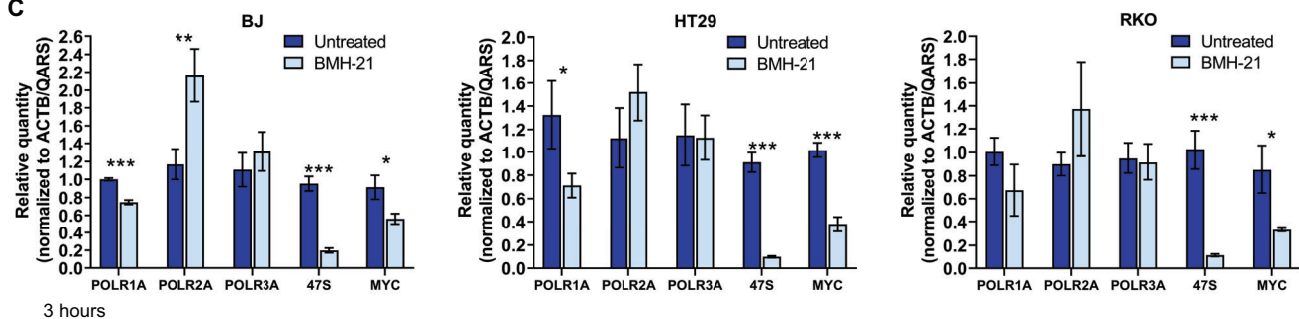

**D**

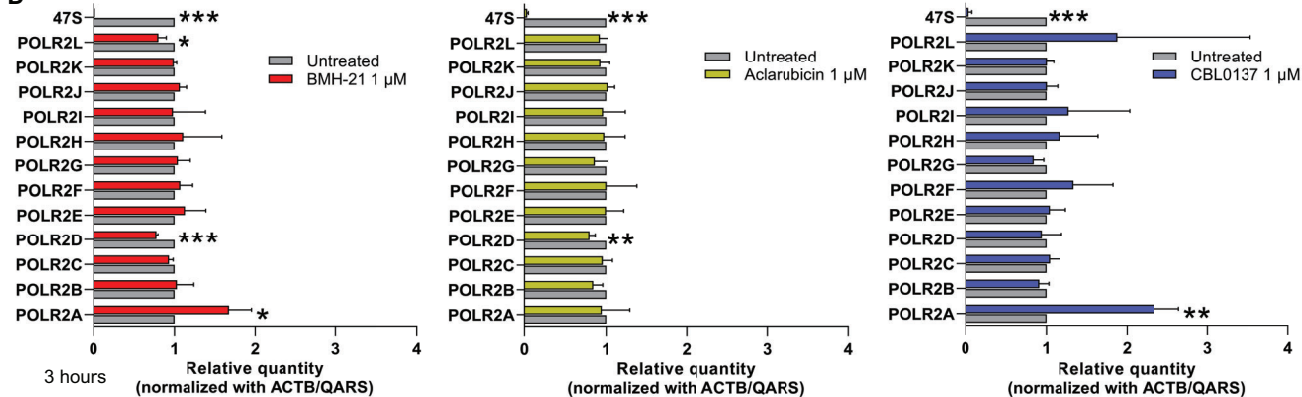



Supplementary Figure 2

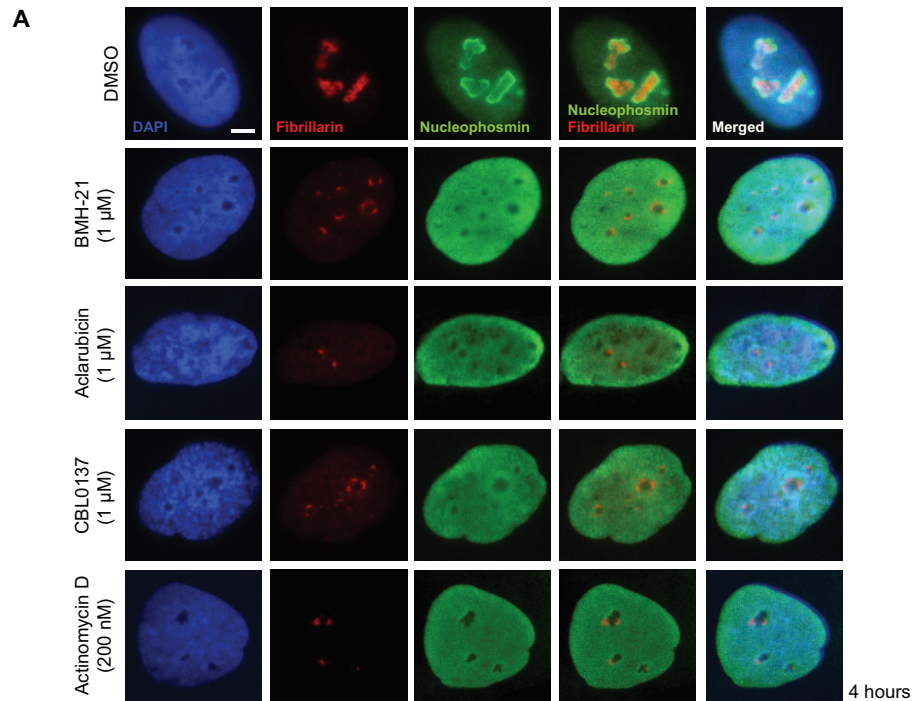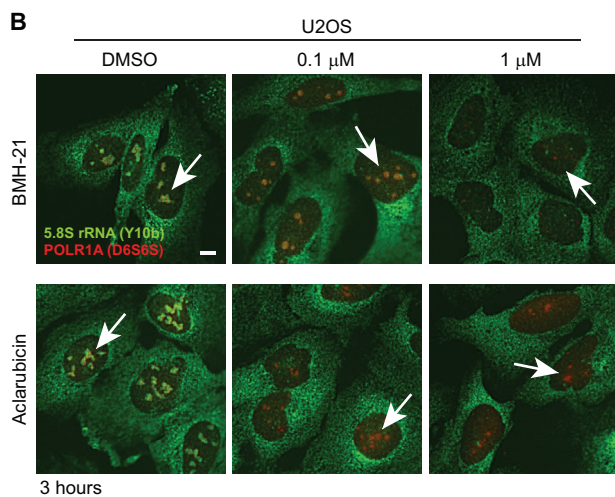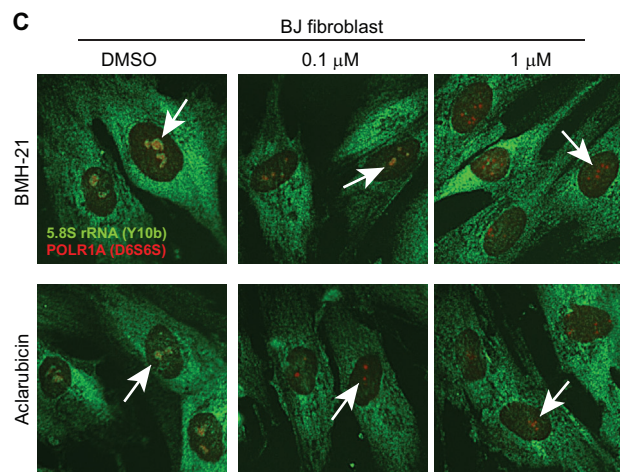

**Supplementary Figure 3**

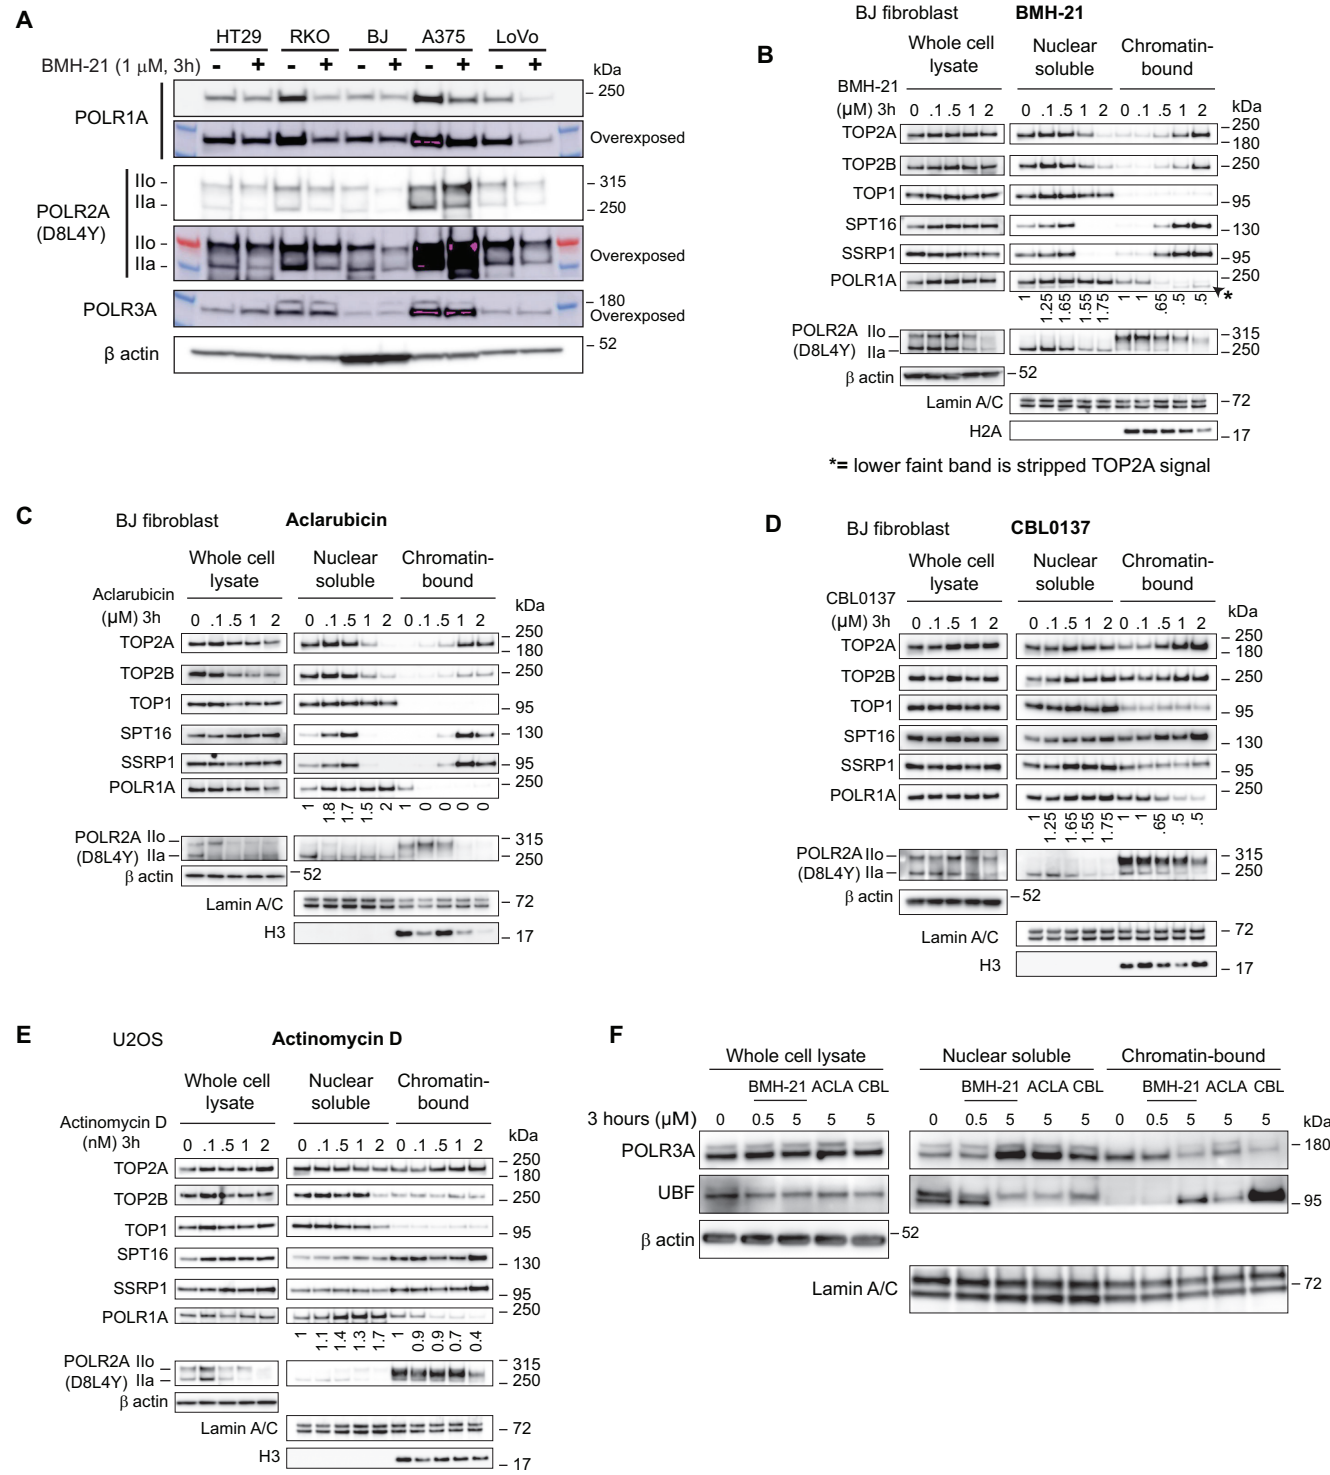

# Supplementary Figure 4

**A**

Doses of **BMH-21** for 1 hour → 1  $\mu$ M **Doxorubicin** or 1  $\mu$ M **Etoposide** for 3 hours

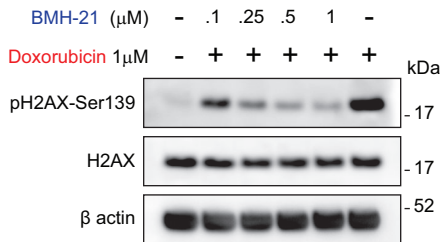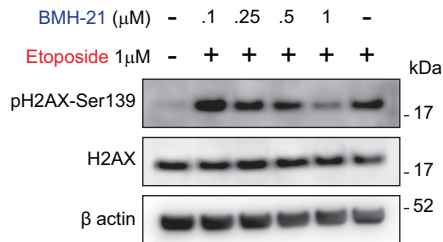

**B**

1  $\mu$ M **Triptolide** or 100 nM **Actinomycin D** for 1 hour → 1  $\mu$ M **Doxorubicin** or 1  $\mu$ M **Etoposide** for 3 hours

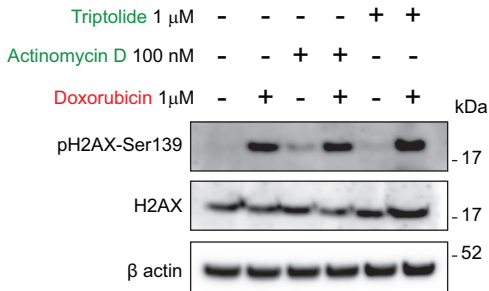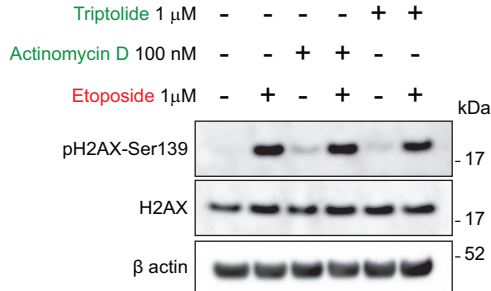

Supplement: gkae069_supplemental_file.pdf [file gkae069_supplemental_file.pdf]
